# Supplementary material
Source: MDPI journal article supplement (https://www.mdpi.com/2571-9408/5/4/218)
Supplement: s1 [file s1]

# Supplement material

S1: Table of the fungi species identified on the books in 2017 in the library.

| Sample Nr.<br>location<br>object                             | Fungi species detected on<br>books                                                                                                                               |
|--------------------------------------------------------------|------------------------------------------------------------------------------------------------------------------------------------------------------------------|
| OK 1 shelf 76<br>Rote Bände                                  | <i>Aspergillus</i> sp.<br><i>Penicillium</i> sp.<br><i>Chaetomium</i> sp.                                                                                        |
| OK 2 shelf 76<br>Geschichte Russland                         | <i>Aspergillus versicolor</i><br><i>Aspergillus</i> sect. <i>niger</i><br><i>Cladosporium</i> sp.<br><i>Eurotium</i> cf. <i>halophilicum</i><br><i>Mucor</i> sp. |
| OK 3 shelf 71<br>Bouganville                                 | <i>Eurotium</i> cf. <i>halophilicum</i><br><i>Wallemia</i> sp.                                                                                                   |
| OK 4 shelf 61<br>Wiener Gartenzeitung                        | <i>Eurotium</i> cf. <i>halophilicum</i>                                                                                                                          |
| OK 5 shelf 5<br>E24I552                                      | <i>Eurotium</i> cf. <i>halophilicum</i>                                                                                                                          |
| OK 6 shelf 5<br>E24I552                                      | <i>Eurotium</i> cf. <i>halophilicum</i>                                                                                                                          |
| OK 7 shelf 5<br>E24I726                                      | <i>Cladosporium</i> sp.<br><i>Eurotium</i> cf. <i>halophilicum</i><br><i>Mucor</i> sp.<br><i>Penicillium</i> sp.                                                 |
| OK 8 shelf 86<br>Steinhausen „Geschichte der Dt.<br>Kultur“  | <i>Eurotium</i> cf. <i>halophilicum</i>                                                                                                                          |
| OK 9 shelf 84<br>Holtzmann „Franz.<br>Verfassungsgeschichte“ | <i>Eurotium</i> cf. <i>halophilicum</i>                                                                                                                          |

Table S2: Concentration of the airborne fungi spores in the air samples 2017 in the library.

| Nr. / Sample location                           | KBE / m3<br>MEA | KBE / m3<br>DG 18 |
|-------------------------------------------------|-----------------|-------------------|
| 1 main room centre                              | 530             | 30                |
| 2 main room centre                              | 70              | 180               |
| 3 main room centre                              | 100             | 50                |
| 4 nish shelf 49-51                              | 140             | 60                |
| 5 nish next to window between<br>shelf 53 a. 56 | 90              | 60                |
| 6 nish shelf 62-64                              | 70              | 20                |
| 7 nish shelf 93-94                              | 120             | 70                |
| 8 nish                                          | 80              | 20                |
| 9 nish shelf 29                                 | 80              | 10                |
| 10 at entrance                                  | 60              | 10                |

Species found in the air samples:

*Alternaria* sp.

*Aspergillus candidus*

*Aspergillus ochraceus*

*Aspergillus versicolor*

*Cladosporium* spp.

*Epicoccum* sp.

*Exophiala* sp.

*Fusarium* sp.

*Oidodendron* sp.

*Penicillium brevicompactum*

***Penicillium commune***

***Penicillium chrysogenum***

*Paecilomyces* sp.

*Wallemia* sp.

Table S3: Total catch at library each year.

|                        | 2014 | 2015 | 2016 | 2017 | 2018 | 2019 | 2020 | 2021 | 2022 |
|------------------------|------|------|------|------|------|------|------|------|------|
| <i>S.pamiceum</i>      | 230  | 279  | 600  | 17   | 3    | 0    | 0    | 0    | 1    |
| External               | 5    | 0    | 7    | 35   | 13   | 9    | 22   | 14   | 15   |
| <i>L. saccharinum</i>  | 9    | 12   | 4    | 0    | 1    | 8    | 8    | 3    | 3    |
| <i>C.</i>              |      |      |      |      |      |      |      |      |      |
| <i>longicaudatum</i>   | 0    | 0    | 0    | 2    | 1    | 1    | 4    | 1    | 4    |
| <i>C. Lineatum</i>     | 0    | 0    | 0    | 0    | 0    | 1    | 2    | 1    | 1    |
| <i>C. calvum</i>       | 0    | 0    | 0    | 0    | 0    | 6    | 0    | 0    | 0    |
| <i>Anthrenus v/f</i>   | 36   | 44   | 22   | 46   | 34   | 30   | 32   | 32   | 16   |
| <i>Attagenus</i>       | 0    | 0    | 1    | 0    | 0    | 3    | 3    | 2    | 4    |
| <i>Spider beetle</i>   | 0    | 3    | 3    | 1    | 3    | 3    | 1    | 0    | 2    |
| <i>T. bisselliella</i> | 26   | 18   | 0    | 14   | 4    | 15   | 10   | 5    | 0    |
| <i>P.</i>              |      |      |      |      |      |      |      |      |      |
| <i>interpunctella</i>  | 1    | 0    | 3    | 2    | 0    | 0    | 0    | 0    | 0    |
